# Supplementary material for: Translational Proteomics Analysis of Anthracycline-Induced Cardiotoxicity From Cardiac Microtissues to Human Heart Biopsies
Source: Front Genet. 2021 Jun 15;12:695625. doi: 10.3389/fgene.2021.695625 (PMC8239409; doi:10.3389/fgene.2021.695625)
Supplement: Supplementary Table 1 — The concentrations of anthracycline in the in vitro samples. [file Data_Sheet_1.xlsx]

## Sheet: Table S1
Table S1: The concentrations of anthracycline in the in vitro samples
(extracted from the “Sample list of HeCaToS.txt” file in metadata under assession number S-HECA8 in the BioStudies database (http://www.ebi.ac.uk/biostudies)
Sampling time point	Time range	Incubation time (hours)	Respective concentration [uM]
			Control	Doxorubicin		Epirubicin		Idarubicin
			DMSO	Therapeutic	Toxic	Therapeutic	Toxic	Therapeutic	Toxic
T2	0 - 2 h	2 h	0.062	0.211	0.602	0.221	0.9	0.005	0.087
T8	2 - 8 h	6 h	0.006	0.016	0.046	0.013	0.051	0.001	0.023
T24	8 - 24 h	16 h	0.002	0.008	0.024	0.004	0.018	0.001	0.01
	24 - 26 h	2 h	0.063	0.217	0.62	0.224	0.912	0.006	0.106
	26 - 32 h	6 h	0.007	0.022	0.063	0.015	0.061	0.002	0.037
	32 - 48 h	16 h	0.004	0.013	0.038	0.006	0.025	0.002	0.016
	48 - 50 h	2 h	0.064	0.221	0.631	0.225	0.917	0.006	0.115
	50 - 56 h	6 h	0.008	0.026	0.073	0.016	0.066	0.003	0.046
T72	56 - 72 h	16 h	0.004	0.016	0.046	0.007	0.029	0.002	0.02
	72 - 144 h	72 h	0.013	0.039	0.111	0.028	0.116	0.003	0.038
	144 - 146 h	2 h	0.065	0.227	0.649	0.226	0.923	0.007	0.123
	146 - 152 h	6 h	0.009	0.031	0.09	0.018	0.072	0.003	0.053
T68	152 - 168 h	16 h	0.005	0.021	0.06	0.008	0.034	0.002	0.023
	168 - 170 h	2 h	0.065	0.228	0.65	0.227	0.924	0.007	0.124
	170 - 176 h	6 h	0.01	0.032	0.091	0.018	0.072	0.003	0.053
	176 - 192 h	16 h	0.006	0.021	0.061	0.008	0.034	0.002	0.023
	192 - 194 h	2 h	0.065	0.228	0.651	0.227	0.924	0.007	0.124
	194 - 200 h	6 h	0.01	0.032	0.092	0.018	0.072	0.003	0.053
	200 - 216 h	16 h	0.006	0.022	0.062	0.008	0.034	0.002	0.023
	216 - 218 h	2 h	0.065	0.228	0.652	0.227	0.924	0.007	0.124
	218 - 224 h	6 h	0.01	0.032	0.092	0.018	0.073	0.003	0.053
T240	224 - 240 h	16 h	0.006	0.022	0.062	0.008	0.034	0.002	0.023
	240 - 312 h	72 h	0.014	0.042	0.119	0.029	0.118	0.003	0.039
	312 - 314 h	2 h	0.065	0.229	0.653	0.227	0.925	0.007	0.124
	314 - 320 h	6 h	0.01	0.033	0.093	0.018	0.073	0.003	0.053
T336	320 - 336 h	16 h	0.006	0.022	0.063	0.008	0.034	0.002	0.024

## Sheet: Table S2
Table S2: The demographic and clinical information of the biopsies dataset.
SID	SampleID	Control or Cardiotoxicity	Sex	Cancer.type	Chemotherapeutic agents
10188	20161003_004_10188	Late-onset cardiotoxicity	female	Breast cancer	cyclophosphamide
686	20161003_006_686	Control patients	female	-	-
534	20161003_007_534	Control patients	female	-	-
10201	20161003_009_10201	Late-onset cardiotoxicity	female	Breast cancer	doxorubicin, cyclophosphamide, everolimus, exemestane, taxotene
10132	20161003_010_10132	Late-onset cardiotoxicity	female	Breast cancer	epirubicin, docetaxel
10130	20161003_012_10130	Late-onset cardiotoxicity	female	Breast cancer	doxorubicin, cyclophosphamide, rituximab, vincristin, prednison
271	20161003_013_217	Control patients	female	-	-
442	20161003_015_442	Control patients	female	-	-
10206	20161003_016_10206	Late-onset cardiotoxicity	male	Chronic lymphatic leukemia	doxorubicin, cyclophosphamide, vincristin, prednison
10217	20161003_019_10217	Late-onset cardiotoxicity	female	Adenocarcinoma uterus	doxorubicin, cyclophosphamide, 5-fluorouracil
407	20161003_020_407	Control patients	female	-	-
10204	20161003_022_10204	Late-onset cardiotoxicity	female	Breast cancer	cyclophosphamide, letrozol
397	20161003_023_397	Control patients	male	-	-
523	20161003_025_523	Control patients	female	-	-
10198	20161003_026_10198	Late-onset cardiotoxicity	female	Breast cancer	anthracycline, hormonal therapy
562	20161003_028_562	Control patients	female	-	-
10021	20170428_02_heartbiopsy_1	Control patients	female	-	-
614	20170428_03_heartbiopsy_2	Late-onset cardiotoxicity	female	Breast cancer	doxorubicin, cyclophosphamide, 5-fluorouracil
10059	20170428_05_heartbiopsy_4	Control patients	female	"-"	-
10027	20170428_06_heartbiopsy_5	Late-onset cardiotoxicity	female	Breast cancer	doxorubicin, epirubicin, tamoxifen
10033	20170428_11_heartbiopsy_3	Control patients	male	Prostate cancer

## Sheet: Table S3
Table S3: The top 10 over-represented pathway of selected modules in the in vitro data (p-value<0.01, and q-value <0.01).
The pathway analysis was performed on all proteins as well as only the high module membership proteins of the particular module.
From the high module membership proteins in the blue module, only 6 statistically significant pathways were obtained,
while from the high module membership proteins in the green module no over-represented pathway was obtained.
Using all proteins in the module
Module	Pathway	p-value	q-value
Turquoise	Eukaryotic Translation Elongation	1.15e-25	8.48e-23
	Selenoamino acid metabolism	4.7e-24	1.73e-20
	L13a-mediated translational silencing of Ceruloplasmin expression	1.46e-22	3.59e-20
	Peptide chain elongation	4.49e-22	8.28e-20
	Selenocysteine synthesis	1.56e-21	2.2e-19
	Cap-dependent Translation Initiation	2.24e-22	2.2e-19
	Eukaryotic Translation Initiation	2.24e-22	2.2e-19
	Cytoplasmic Ribosomal Proteins	2.57e-21	2.2e-19
	Formation of a pool of free 40S subunits	2.68e-21	2.2e-19
	Nonsense Mediated Decay (NMD) independent of the Exon Junction Complex (EJC)	3.48e-21	2.57e-19
Blue	Regulation of Insulin-like Growth Factor (IGF) transport and uptake by Insulin-like Growth Factor Binding Proteins (IGFBPs)	2.98111e-11	1.44223e-08
	Post-translational protein phosphorylation	3.84596e-11	1.44223e-08
	Metabolism of proteins	9.71768e-11	2.42942e-08
	Platelet degranulation	4.51517e-10	8.46594e-08
	Response to elevated platelet cytosolic Ca2+	7.78922e-10	1.16838e-07
	The citric acid (TCA) cycle and respiratory electron transport	3.94021e-09	4.92527e-07
	Alzheimer disease - Homo sapiens (human)	2.52792e-08	2.70848e-06
	Protein processing in endoplasmic reticulum - Homo sapiens (human)	1.14175e-07	1.07039e-05
	Neutrophil degranulation	1.46749e-07	1.22291e-05
	Phenytoin (Antiarrhythmic) Action Pathway	2.71626e-07	2.0372e-05
Green	Proteasome - Homo sapiens (human)	2.68151e-07	9.70706e-05
	Proteasome Degradation	2.05271e-06	0.00031147
	UCH proteinases	2.58124e-06	0.00031147
	Metabolism	4.46287e-06	0.000389985
	Fatty acid degradation - Homo sapiens (human)	6.35229e-06	0.000389985
	Metabolism of proteins	6.46384e-06	0.000389985
	Valine, leucine and isoleucine degradation - Homo sapiens (human)	9.82905e-06	0.000492984
	Valine, leucine and isoleucine degradation	1.08947e-05	0.000492984
	Glutamate Glutamine metabolism	1.65989e-05	0.000667645
	Metabolism of amino acids and derivatives	2.75658e-05	0.00097976
Using high module membership proteins in the module
Module	Pathway	p-value	q-value
Turquoise	Eukaryotic Translation Elongation	3.60545e-05	0.000937417
	Formation of the ternary complex, and subsequently, the 43S complex	0.000661982	0.00423966
	Translation initiation complex formation	0.00084078	0.00423966
	Ribosomal scanning and start codon recognition	0.00084078	0.00423966
	Activation of the mRNA upon binding of the cap-binding complex and eIFs, and subsequent binding to 43S	0.000868025	0.00423966
	Translation	0.0010028	0.00423966
	Cytoplasmic Ribosomal Proteins	0.00168566	0.00423966
	Peptide chain elongation	0.00184057	0.00423966
	Eukaryotic Translation Termination	0.00196106	0.00423966
	Selenocysteine synthesis	0.00196106	0.00423966
Blue	Post-translational protein phosphorylation	3.49681e-07	3.7777e-06
	Regulation of Insulin-like Growth Factor (IGF) transport and uptake by Insulin-like Growth Factor Binding Proteins (IGFBPs)	6.29617e-07	3.7777e-06
	Intrinsic Pathway of Fibrin Clot Formation	8.11645e-05	0.000324658
	Formation of Fibrin Clot (Clotting Cascade)	0.000258955	0.000776864
	Metabolism of proteins	0.0036267	0.00870409
	Protein processing in endoplasmic reticulum - Homo sapiens (human)	0.00454225	0.00908451

## Sheet: Table S4
Table S 4: The top 10 over-represented pathway of selected modules in the human biopsies data (p-value<0.01, and q-value <0.01).
The pathway analysis was performed on all proteins as well as on only high module membership protein of the particular module.
Using all proteins in the module
Module	Pathway	p-value	q-value
Turquoise	The citric acid (TCA) cycle and respiratory electron transport	4.57e-20	3.65e-17
	Metabolism	5.73e-20	3.65e-17
	Parkinson disease - Homo sapiens (human)	2.2e-16	9.36e-14
	Huntington disease - Homo sapiens (human)	7.67e-15	2e-12
	Respiratory electron transport, ATP synthesis by chemiosmotic coupling, and heat production by uncoupling proteins.	7.82e-15	2e-12
	Respiratory electron transport	1.04e-14	2.22e-12
	Eukaryotic Translation Elongation	7.6e-13	1.38e-10
	SRP-dependent cotranslational protein targeting to membrane	1.64e-12	2.61e-10
	Electron Transport Chain (OXPHOS system in mitochondria)	2.36e-12	3.34e-10
	Cytoplasmic Ribosomal Proteins	1.6e-11	2.04e-09
Blue	Electron Transport Chain (OXPHOS system in mitochondria)	3.54e-18	3.09e-15
	Parkinson disease - Homo sapiens (human)	7.91e-17	3.46e-14
	Complex I biogenesis	1.78e-15	3.95e-13
	Oxidative phosphorylation - Homo sapiens (human)	1.81e-15	3.95e-13
	Respiratory electron transport, ATP synthesis by chemiosmotic coupling, and heat production by uncoupling proteins.	3.17e-15	5.55e-13
	Respiratory electron transport	4.53e-15	6.6e-13
	Oxidative phosphorylation	9.12e-15	8.47e-13
	3-Methylglutaconic Aciduria Type I	2.32e-14	8.47e-13
	Valine, Leucine and Isoleucine Degradation	2.32e-14	8.47e-13
	2-Methyl-3-Hydroxybutryl CoA Dehydrogenase Deficiency	2.32e-14	8.47e-13
Brown	The citric acid (TCA) cycle and respiratory electron transport	5.87e-25	5.65e-22
	Metabolism	5.72e-20	2.76e-17
	superpathway of conversion of glucose to acetyl CoA and entry into the TCA cycle	3.01e-18	9.66e-16
	Pyruvate metabolism and Citric Acid (TCA) cycle	5.54e-17	1.33e-14
	Metabolic reprogramming in colon cancer	2.61e-16	5.02e-14
	The oncogenic action of L-2-hydroxyglutarate in Hydroxygluaricaciduria	3.35e-16	5.38e-14
	The oncogenic action of D-2-hydroxyglutarate in Hydroxygluaricaciduria	6.16e-16	8.47e-14
	Glutaminolysis and Cancer	7.49e-16	9.01e-14
	Warburg Effect	9.54e-16	1.02e-13
	Pyruvate dehydrogenase deficiency (E3)	3.12e-15	1.88e-13
Yellow	Signaling events mediated by HDAC Class III	1.49e-17	1.15e-14
	Deposition of new CENPA-containing nucleosomes at the centromere	2.86e-15	7.36e-13
	Nucleosome assembly	2.86e-15	7.36e-13
	Meiotic synapsis	1.18e-14	1.95e-12
	RHO GTPases activate PKNs	1.27e-14	1.95e-12
	HDMs demethylate histones	4.22e-14	5.42e-12
	Packaging Of Telomere Ends	1.01e-13	1.12e-11
	G2/M DNA damage checkpoint	1.91e-13	1.84e-11
	Nonhomologous End-Joining (NHEJ)	2.76e-13	2.36e-11
	Condensation of Prophase Chromosomes	9.96e-13	7.68e-11
Green	tRNA charging	1.5e-08	7.78e-06
	tRNA Aminoacylation	3.48e-08	7.78e-06
	Metabolism	3.95e-08	7.78e-06
	Aminoacyl-tRNA biosynthesis - Homo sapiens (human)	5.11e-08	7.78e-06
	Metabolism of proteins	7.34e-08	8.94e-06
	Beta1 integrin cell surface interactions	9.94e-08	1.01e-05
	Translation	1.43e-07	1.25e-05
	The citric acid (TCA) cycle and respiratory electron transport	1.94e-07	1.48e-05
	Signaling by RAS mutants	2.22e-07	1.5e-05
	Signaling by moderate kinase activity BRAF mutants	3.29e-07	1.82e-05
Using high module membership proteins in the module
Module	Pathway	p-value	q-value
Turquoise	Metabolism	5.44e-09	2.7e-06
	Ion homeostasis	7.9e-09	2.7e-06
	Adrenergic signaling in cardiomyocytes - Homo sapiens (human)	2.19e-08	4.99e-06
	Dilated cardiomyopathy (DCM) - Homo sapiens (human)	3.92e-08	6.63e-06
	Mitochondrial protein import	4.86e-08	6.63e-06
	cAMP signaling pathway - Homo sapiens (human)	6.82e-08	7.18e-06
	Endocrine and other factor-regulated calcium reabsorption - Homo sapiens (human)	9e-08	7.18e-06
	Vpr-mediated induction of apoptosis by mitochondrial outer membrane permeabilization	5.17e-07	7.18e-06
	AMPK signaling pathway - Homo sapiens (human)	5.24e-07	7.18e-06
	Bopindolol Action Pathway	5.69e-07	7.18e-06
Blue	Cardiac muscle contraction - Homo sapiens (human)	4.96e-07	0.000142
	Striated Muscle Contraction	2.25e-06	0.000322
	Striated Muscle Contraction Pathway	3.44e-06	0.000328
	Parkin-Ubiquitin Proteasomal System pathway	5.26e-06	0.000376
	Branched-chain amino acid catabolism	1.11e-05	0.00043
	3-Methylglutaconic Aciduria Type I	3.31e-05	0.00043
	Valine, Leucine and Isoleucine Degradation	3.31e-05	0.00043
	2-Methyl-3-Hydroxybutryl CoA Dehydrogenase Deficiency	3.31e-05	0.00043
	Isovaleric Aciduria	3.31e-05	0.00043
	3-Methylcrotonyl Coa Carboxylase Deficiency Type I	3.31e-05	0.00043
Brown	The citric acid (TCA) cycle and respiratory electron transport	4.61e-10	9.26e-08
	Mitochondrial protein import	2.19e-08	2.2e-06
	Omega-6 fatty acid metabolism	1.88e-07	1.26e-05
	Citrate cycle	3.79e-07	1.91e-05
	TCA Cycle (aka Krebs or citric acid cycle)	1.06e-06	3.23e-05
	Cristae formation	1.36e-06	3.23e-05
	Formation of ATP by chemiosmotic coupling	1.36e-06	3.23e-05
	TCA cycle	1.71e-06	3.23e-05
	Respiratory electron transport, ATP synthesis by chemiosmotic coupling, and heat production by uncoupling proteins.	1.8e-06	3.23e-05
	Pyruvate dehydrogenase deficiency (E3)	2.63e-06	3.23e-05
Yellow	Signaling events mediated by HDAC Class III	1.09e-23	2.55e-21
	Deposition of new CENPA-containing nucleosomes at the centromere	5.6e-23	4.35e-21
	Nucleosome assembly	5.6e-23	4.35e-21
	RHO GTPases activate PKNs	9.29e-23	5.41e-21
	Meiotic synapsis	2.41e-22	1.12e-20
	HDMs demethylate histones	8.98e-22	3.49e-20
	Nonhomologous End-Joining (NHEJ)	1.77e-21	5.88e-20
	Packaging Of Telomere Ends	2.23e-21	6.5e-20
	G2/M DNA damage checkpoint	5.47e-21	1.41e-19
	Recruitment and ATM-mediated phosphorylation of repair and signaling proteins at DNA double strand breaks	8.43e-21	1.96e-19
Green	tRNA charging	2.39e-07	2.55e-05
	tRNA Aminoacylation	4.01e-07	2.55e-05
	Aminoacyl-tRNA biosynthesis - Homo sapiens (human)	5.09e-07	2.55e-05
	Metabolism of proteins	1.71e-06	6.42e-05
	Neutrophil degranulation	5.63e-05	0.00145
	Mitochondrial tRNA aminoacylation	5.8e-05	0.00145
	Innate Immune System	7.81e-05	0.0016
	Cytosolic tRNA aminoacylation	8.77e-05	0.0016
	Translation	9.63e-05	0.0016
	Activation of C3 and C5	0.000271	0.00407
